# Supplementary material for: Discovery of Potential Anti-Microbial Molecules and Spectrum Correlation Effect of Ardisia crenata Sims via High-Performance Liquid Chromatography Fingerprints and Molecular Docking
Source: MDPI journal article supplement (doi:10.3390/molecules29051178), 2024-03-06
Supplement: s1 [file s1]

---

## Supplementary Materials

# Discovery of Potential Anti-Microbial Molecules and Spectrum Correlation Effect of *Ardisia crenata* Sims via High-Performance Liquid Chromatography Fingerprints and Molecular Docking

Chunli Zhao <sup>1,†</sup>, Changbin Wang <sup>2,†</sup>, Yongqiang Zhou <sup>1,\*</sup>, Tao Hu <sup>1</sup>, Yan Zhang <sup>1</sup>, Xiang Lv <sup>1</sup>, Jiaxin Li <sup>1</sup> and Ying Zhou <sup>1</sup>

<sup>1</sup> College of Pharmacy, Guizhou University of Traditional Chinese Medicine, Guiyang 550025, China

<sup>2</sup> Kunming Institute of Botany, Chinese Academy of Sciences, Kunming 650201, China

\* Correspondence: zhouyongqiang041@gzy.edu.cn

† These authors contributed equally to this work.

---

|                                                                                                      |   |
|------------------------------------------------------------------------------------------------------|---|
| Figure S1. The chromatogram of standards solution of bergenin.....                                   | 3 |
| Figure S2. The chromatogram of standards solution of (-)-gallocatechin.....                          | 3 |
| Figure S3. The chromatogram of standards solution of 11- $\alpha$ -D-galactopyranoside-bergenin..... | 4 |
| Figure S4. The chromatogram of standards solution of 11- $\beta$ -D-glucopyranosyl-bergenin.....     | 4 |
| Figure S5. The chromatogram of standards solution of 11-O-galloybergenin.....                        | 5 |
| Figure S6. The HR-ESI-MS spectrum of 11- $\alpha$ -D-galactopyranosidebergenin.....                  | 6 |
| Figure S7. The HR-ESI-MS spectrum of 11- $\beta$ -D-glucopyranosyl-bergenin.....                     | 7 |
| Figure S8. The HR-ESI-MS spectrum of 11-O-galloybergenin.....                                        | 8 |
| Table S1. Origin of <i>Ardisia crenata</i> Sims.....                                                 | 9 |

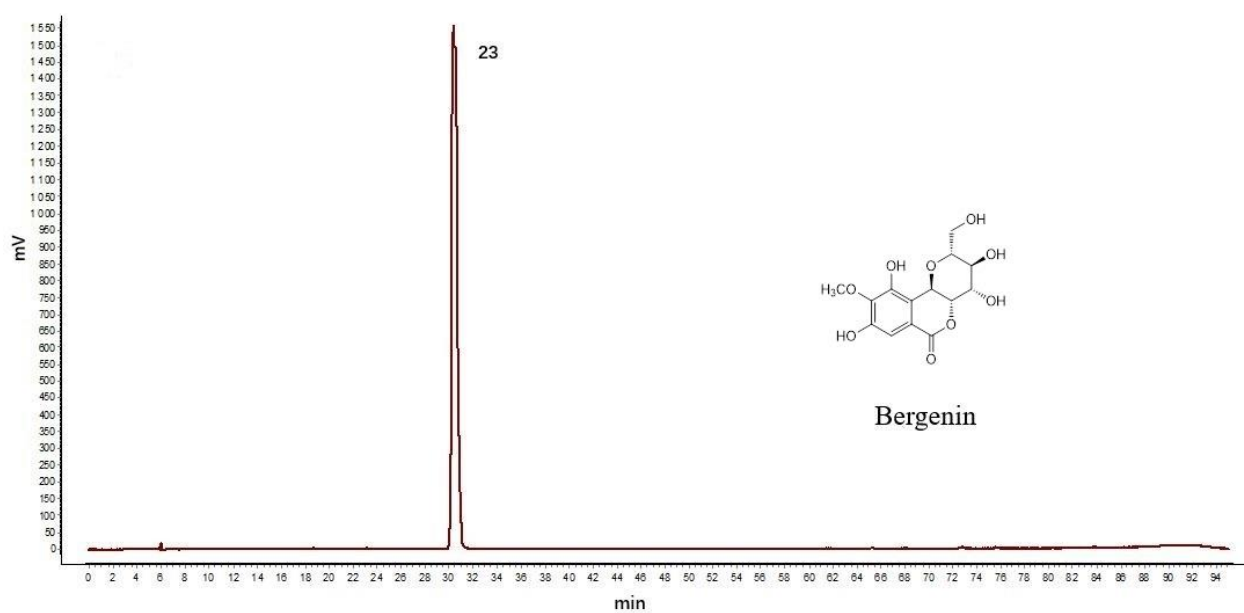

Figure S1. The chromatogram of standard solution of bergenin

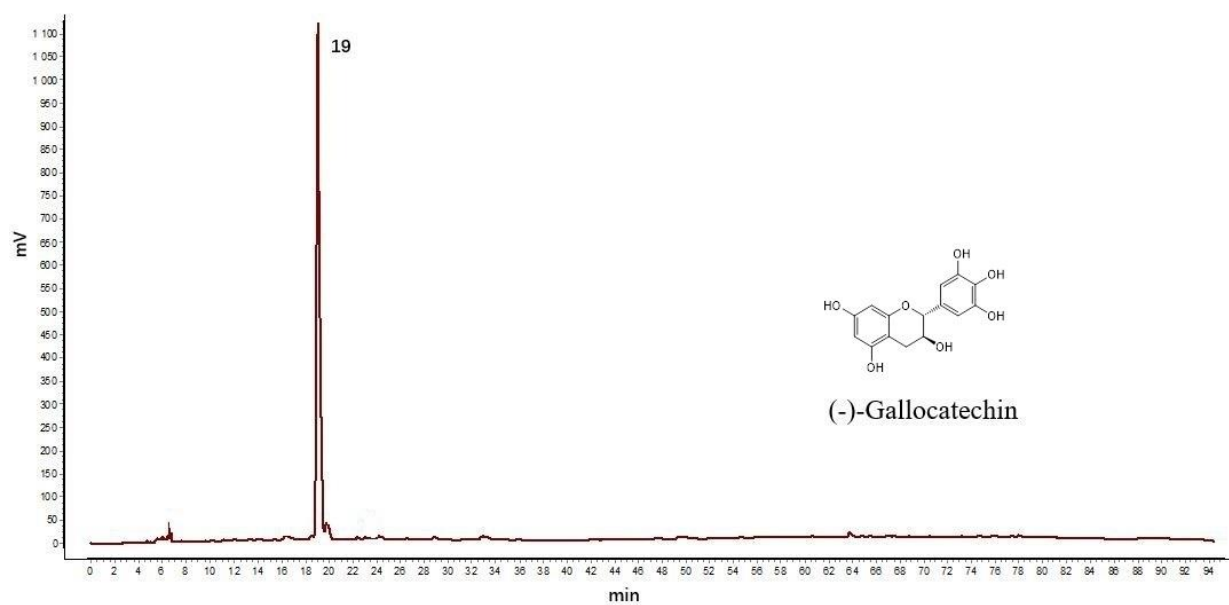

Figure S2. The chromatogram of standard solution of (-)-gallocatechin

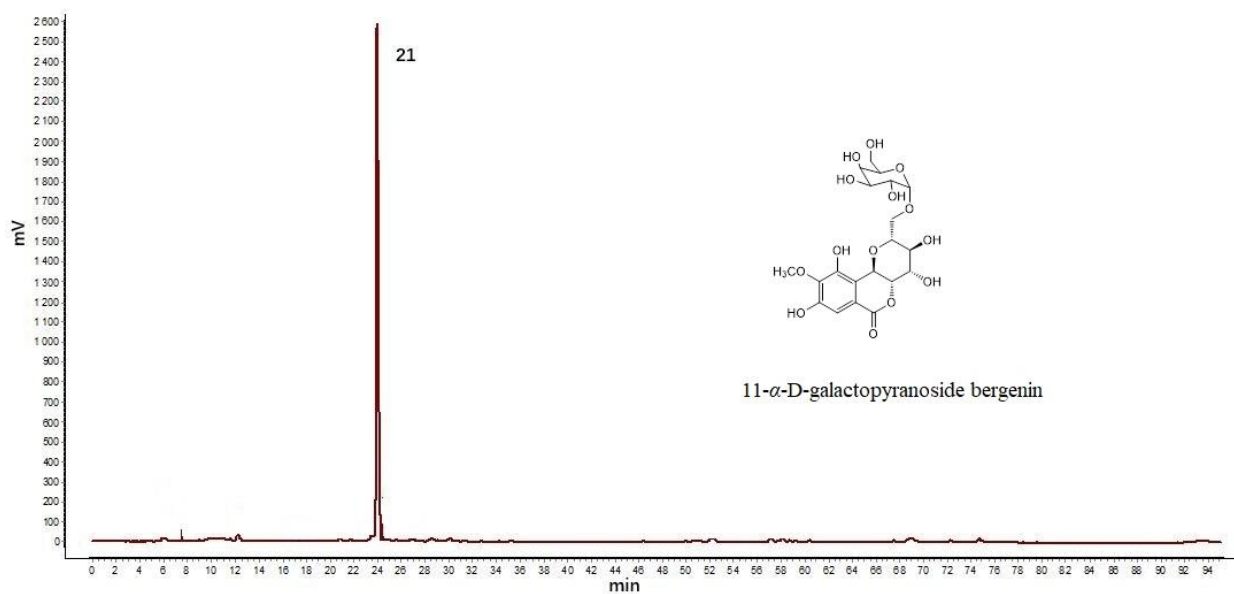Figure S3. The chromatogram of standard solution of 11- $\alpha$ -D-galactopyranoside-bergenin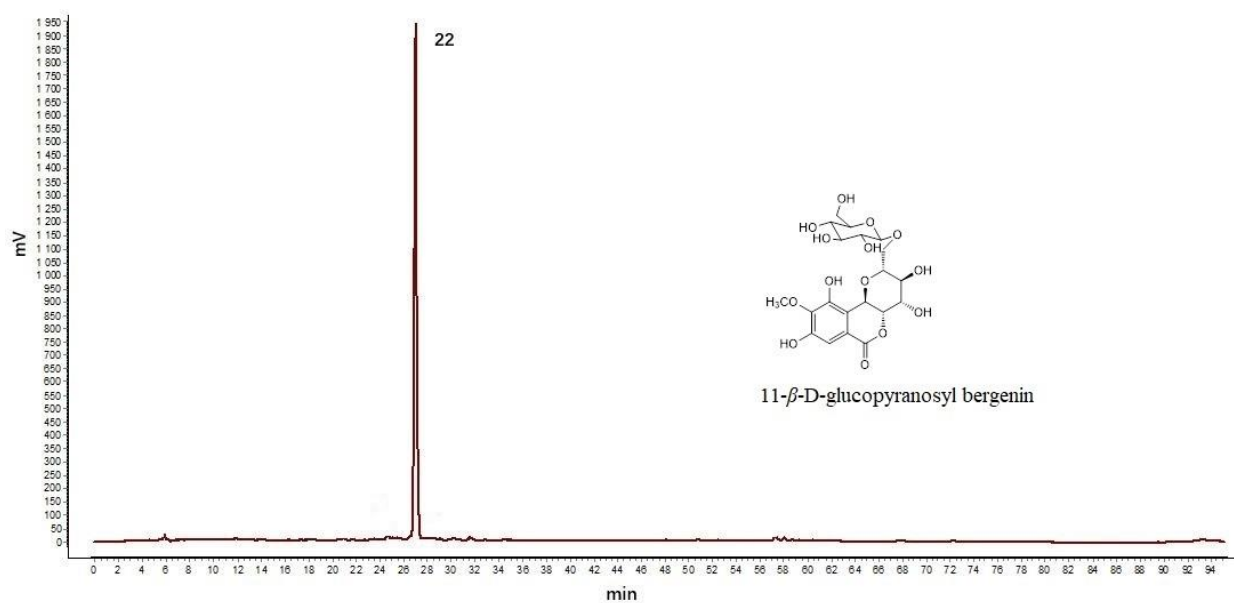Figure S4. The chromatogram of standard solution of 11- $\beta$ -D-glucopyranosyl-bergenin

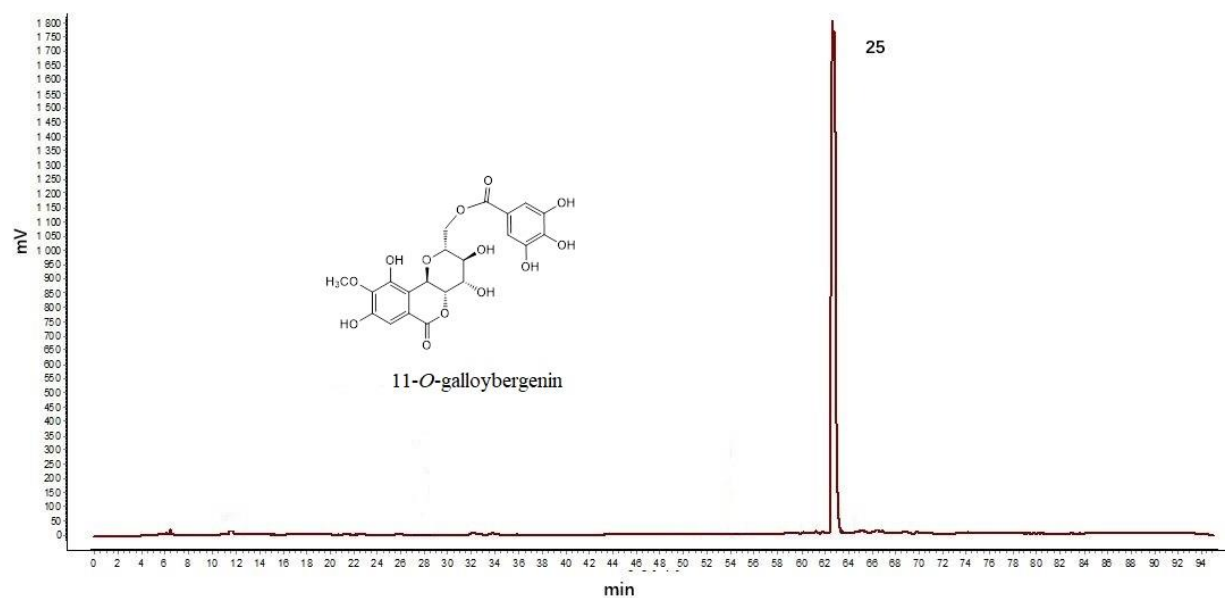

Figure S5. The chromatogram of standard solution of 11-O-galloybergenin

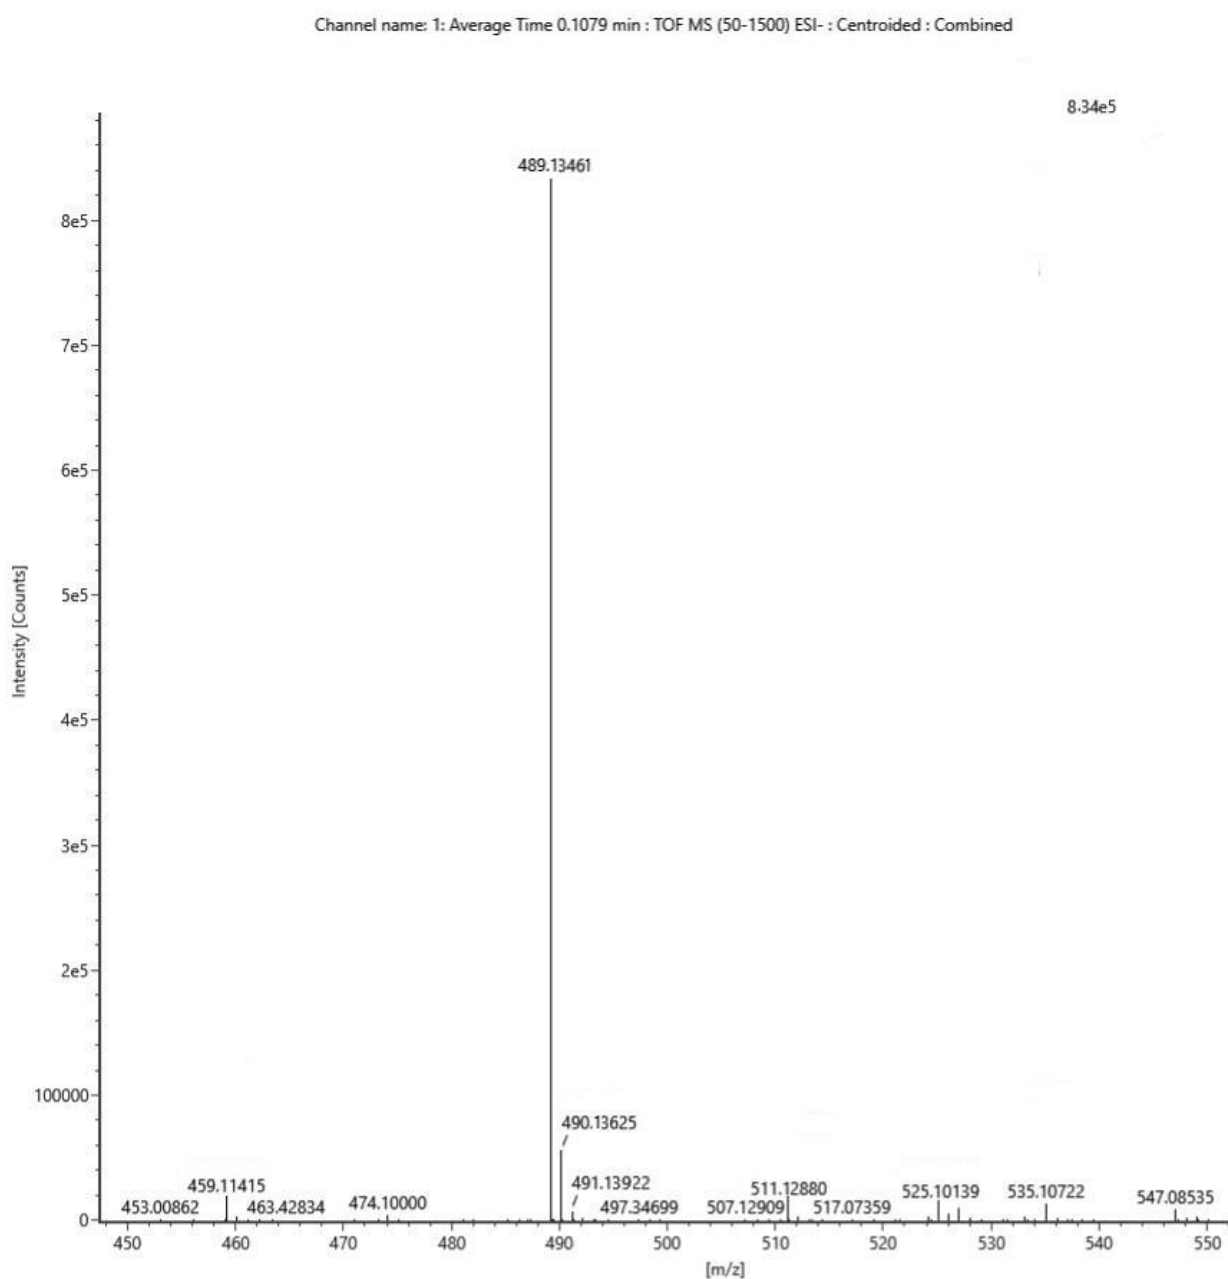

Figure S6. The HR-ESI-MS spectrum of 11- $\alpha$ -D-galactopyranoside bergenin

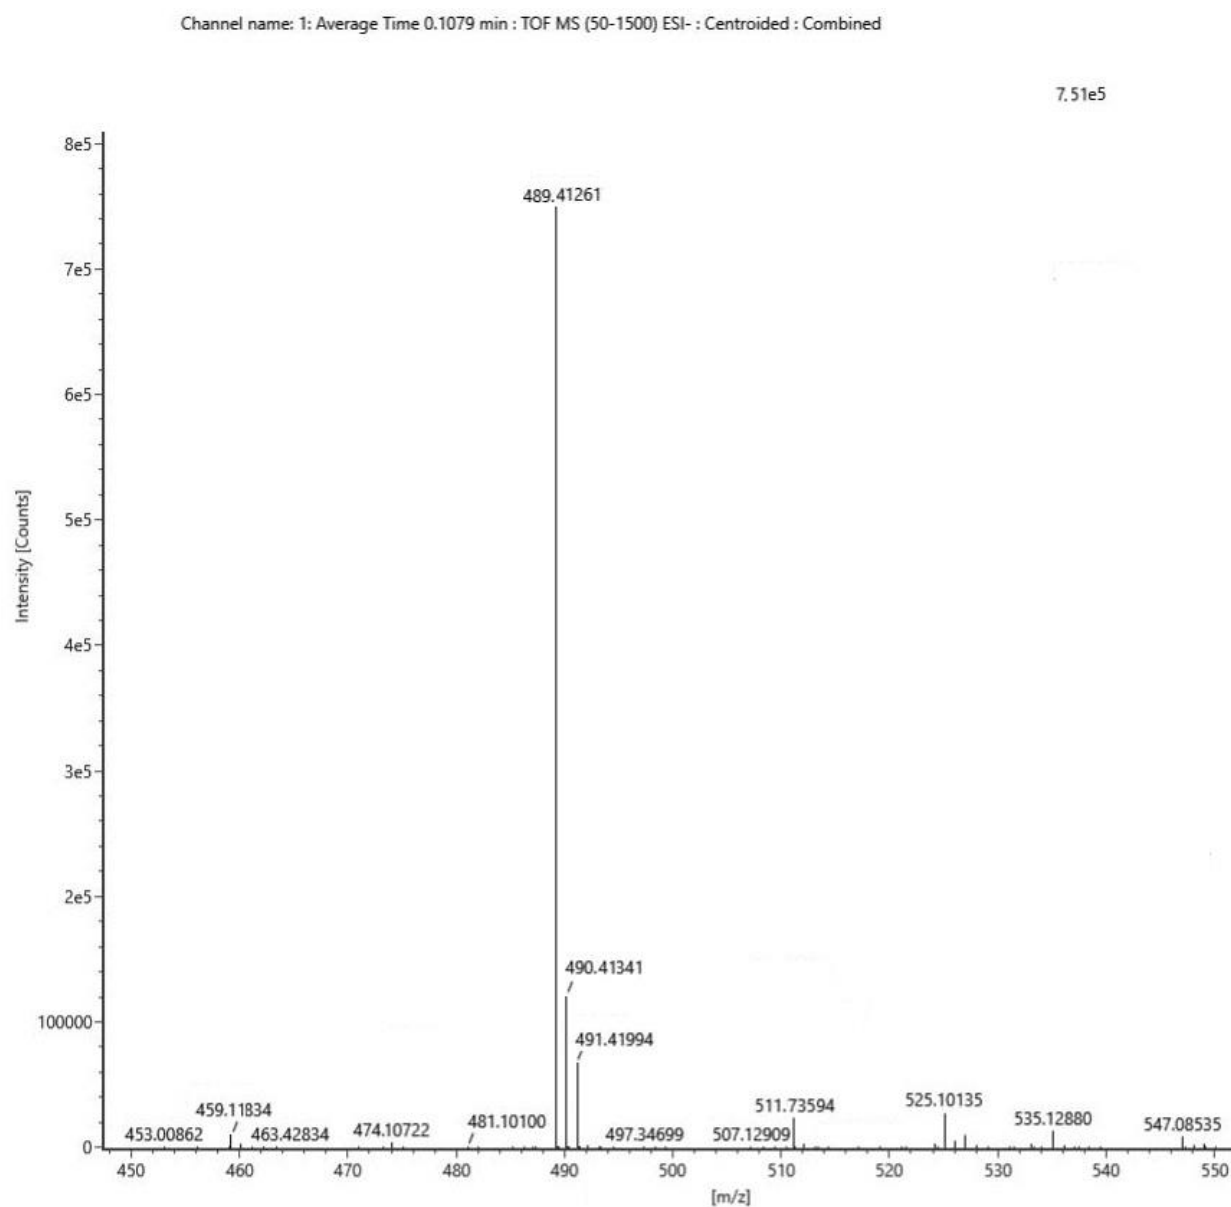

Figure S7. The HR-ESI-MS spectrum of 11- $\beta$ -D-glucopyranosyl-bergenin

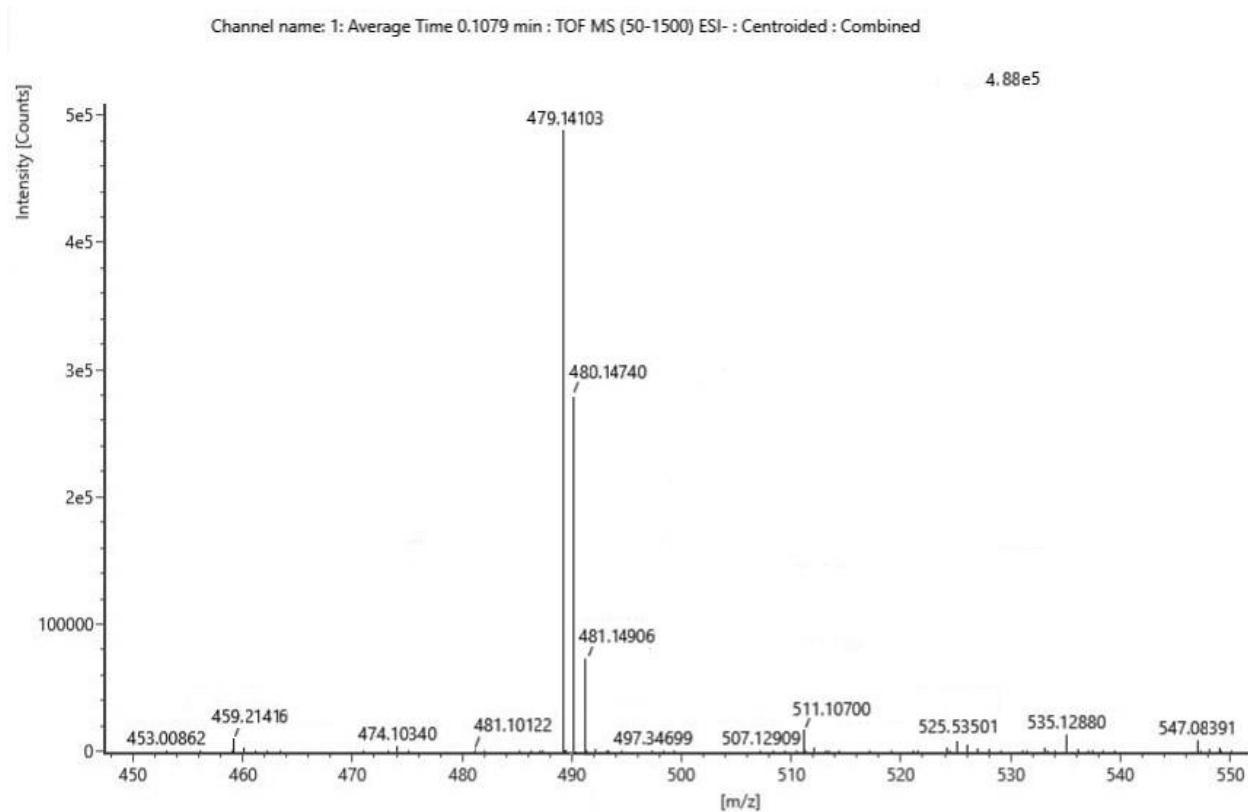

Figure S8. The HR-ESI-MS spectrum of 11-O-galloybergenin

Table S1. Origin of *Ardisia crenata* Sims

| Numbering | Lot number | Source of medicinal materials                          |
|-----------|------------|--------------------------------------------------------|
| S1        | 20190331   | Changshun County, Qiannan Prefecture, Guizhou Province |
| S2        | 20190405   | Wudang District, Guiyang City, Guizhou Province        |
| S3        | 20190625   | Nanming District, Guiyang City, Guizhou Province       |
| S4        | 20190723   | Kaiyang County, Guiyang City, Guizhou Province         |
| S5        | 20190901   | Huaxi District, Guiyang City, Guizhou Province         |
| S6        | 20190922   | Huaxi District, Guiyang City, Guizhou Province         |
| S7        | 20190922   | Maling Town, Xingyi City, Guizhou Province             |
| S8        | 20191005   | Nanming District, Guiyang City, Guizhou Province       |
| S9        | 20191018   | Guanling County, Anshun City, Guizhou Province         |
| S10       | 20190711   | Muyang County, Suqian City, Jiangsu Province           |
| S11       | 20190721   | Xinhe Town, Suqian City, Jiangsu Province              |
| S12       | 20190722   | Yanji Town, Suqian City, Jiangsu Province              |
| S13       | 20190722   | Huaiyin District, Huaian City, Jiangsu Province        |
| S14       | 20190710   | Ziliang Town, Yulin City, Guangxi Province             |
| S15       | 20190723   | Rong'an County, Liuzhou City, Guangxi Province         |
| S16       | 20190723   | Pingfu Township, Shangyou City, Jiangxi Province       |
